# Supplementary material for: Acceptance, Advocacy, and Perception of Health Care Providers on COVID-19 Vaccine: Comparing Early Stage of COVID-19 Vaccination with Latter Stage in the Eastern Region of Saudi Arabia
Source: Vaccines (Basel). 2023 Feb 20;11(2):488. doi: 10.3390/vaccines11020488 (PMC9963779; doi:10.3390/vaccines11020488)
Supplement: Supplementary file 1 [file vaccines-11-00488-s001.zip › vaccines-2159757-supplementary.pdf]

# Perceptions and trust among health care providers (HCP) toward acceptance and advocate for newly developed vaccine for COVID- 19

You are invited to participate in this study about perceptions and Trust among Health Care Providers (HCP) toward Acceptance and Advocate for Newly Developed Vaccine for COVID-19. All the information is anonymous and confidential. It takes you 3 minutes to complete the survey. Your participation is appreciated

If you accept to participate please press Next

\* Required

## Section A

1. Gender \*

*Mark only one oval.*

☐ Female

☐ Male

2. Age \*

*Mark only one oval.*

- ☐ 25 years and below
- ☐ 26 – 35 years
- ☐ 36 – 50
- ☐ above 50 years

3. Education \*

*Mark only one oval.*

- ☐ Diploma
- ☐ Bachelor
- ☐ Post graduate Diploma
- ☐ Master Degree
- ☐ PhD

4. Total years of experience (since graduation) \*

*Mark only one oval.*

- ☐ 5 years and less
- ☐ 6 – 10 years
- ☐ More than 10 years

5. What is your nationality? \*

*Mark only one oval.*

- ☐ Saudi
- ☐ Non-Saudi

6. Occupation \*

*Mark only one oval.*

- ☐ Doctor
- ☐ Dentist
- ☐ Pharmacist
- ☐ Nurse
- ☐ Physiotherapist
- ☐ Laboratory
- ☐ Other: \_\_\_\_\_

7. Marital Status \*

*Mark only one oval.*

- ☐ Married
- ☐ Single
- ☐ Divorce
- ☐ Widow

8. Do you have kids? \*

*Mark only one oval.*

☐ Yes

☐ No

9. Do you have comorbidity (any chronic disease)? \*

*Mark only one oval.*

☐ Yes

☐ No

10. Do you take any medication on regular base? \*

*Mark only one oval.*

☐ Yes

☐ No

11. Do you feel you are at a high risk to get COVID infection? \*

*Mark only one oval.*

☐ Yes

☐ No

12. Have you taken the newly developed vaccine to immunize yourself against Covid-19? \*

*Mark only one oval.*

- ☐ Yes      *Skip to question 14*
- ☐ No      *Skip to question 13*

*Skip to question 18*

## Section B

13. 13. If No, please indicate the reason \*

*Mark only one oval.*

- ☐ I was hesitant about taking the vaccine
- ☐ I was worried about the possible side effects
- ☐ I was infected with covid 19 < 6 months
- ☐ I didn't find an appointment yet

*Skip to question 18*

## Section C

14. When did you take the vaccine (month, year) ? \*

---

15. Was it one or two shots ? \*

*Mark only one oval.*

☐ I received only first shot

☐ I received both shots

16. Did you experience side effects ? \*

*Mark only one oval.*

☐ Yes

☐ No      *Skip to question 18*

## Section D

17. If Yes, What side effects \*

*Check all that apply.*

☐ Pain

☐ Itching

☐ Fever

☐ Other: \_\_\_\_\_

## Section F

18. Do you think there is a possibility of infection or re-infection following vaccination? \*

*Mark only one oval.*

☐ Yes

☐ No

19. Have you advised others to take the newly developed vaccine against COVID-19? \*

*Mark only one oval.*

☐ Yes I have

☐ No I have not

☐ I Was hesitant to do so

20. Who did you trust the most for information on vaccination? \*

*Mark only one oval.*

☐ Leaders

☐ Policy makers

☐ Health care providers

☐ Media

☐ Influencers

☐ None

☐ Other: \_\_\_\_\_

21. Do you have allergies to medication, food, or any vaccine? \*

*Mark only one oval.*

☐ Yes

☐ No

22. Have you ever had a serious reaction following a vaccination/ or any bad experience? \*

*Mark only one oval.*

☐ Yes

☐ No

23. Do you take influenza vaccine annually? \*

*Mark only one oval.*

☐ Yes

☐ No

24. Do you think that mode of administration influence acceptance, oral and nasal are more convenient? \*

*Mark only one oval.*

☐ Yes

☐ No

25. Do you think that public hesitancy toward accepting newly developed vaccine is high.? \*

*Mark only one oval.*

☐ Yes

☐ No

Section  
G

Please score 1, 2, 3, 4 or 5 for each statement. (1 reflect strongly disagree, 2 disagree, 3 neutral, 4 agree and 5 strongly agree).

26. I have good medical knowledge on vaccine safety and efficacy. \*

*Mark only one oval.*

☐ Strongly agree

☐ Agree

☐ Neutral

☐ Disagree

☐ Strongly disagree

27. I trust the manufacturing country of the vaccine. \*

*Mark only one oval.*

- ☐ Strongly agree
- ☐ Agree
- ☐ Neutral
- ☐ Disagree
- ☐ Strongly disagree

28. I trust the manufacturing company of the vaccine. \*

*Mark only one oval.*

- ☐ Strongly agree
- ☐ Agree
- ☐ Neutral
- ☐ Disagree
- ☐ Strongly disagree

29. I believe vaccines is tested long enough for safety and efficacy. \*

*Mark only one oval.*

- ☐ Strongly agree
- ☐ Agree
- ☐ Neutral
- ☐ Disagree
- ☐ Strongly disagree

30. I think leaders and policy makers should \*  
take vaccination first.

*Mark only one oval.*

- ☐ Strongly agree  
☐ Agree  
☐ Neutral  
☐ Disagree  
☐ Strongly disagree

31. I think previous bad scientific history \*  
increases hesitancy e.g (Guillain-Barre  
Syndrome ).

*Mark only one oval.*

- ☐ Strongly agree  
☐ Agree  
☐ Neutral  
☐ Disagree  
☐ Strongly disagree

32. I think media has created positive \*  
impression about the vaccine.

*Mark only one oval.*

- ☐ Strongly agree  
☐ Agree  
☐ Neutral  
☐ Disagree  
☐ Strongly disagree

33. I think media has created negative impression about the vaccine. \*

*Mark only one oval.*

- ☐ Strongly agree
- ☐ Agree
- ☐ Neutral
- ☐ Disagree
- ☐ Strongly disagree

34. I believe vaccine's industry is driven by financial motives and not health interest. \*

*Mark only one oval.*

- ☐ Strongly agree
- ☐ Agree
- ☐ Neutral
- ☐ Disagree
- ☐ Strongly disagree

35. I think honest scientific facts on vaccine provoke acceptance. \*

*Mark only one oval.*

- ☐ Strongly agree
- ☐ Agree
- ☐ Neutral
- ☐ Disagree
- ☐ Strongly disagree

36. I believe forced vaccination by authorities provoke hesitancy.

\*

*Mark only one oval.*

- ☐ Strongly agree
- ☐ Agree
- ☐ Neutral
- ☐ Disagree
- ☐ Strongly disagree

---

This content is neither created nor endorsed by Google.

**Google Forms**
